# Supplementary material
Source: publisher figshare collection journal article supplement (https://acs.figshare.com/ndownloader/files/8799622)

# **Critical Assessment of Using Ionic Liquid as Entrainer via Extractive Distillation**

## **Supporting Information**

Hung-Hsin Chen, Meng-Kai Chen, Bor-Chang Chen, and I-Lung Chien<sup>\*</sup>

Department of Chemical Engineering,  
National Taiwan University,  
Taipei 10617, Taiwan

---

<sup>\*</sup> Corresponding author. I-Lung Chien, Tel: +886-3-3366-3063; Fax: +886-2-2362-3040; E-mail: ilungchien@ntu.edu.tw

This text file is the supporting information for the paper “Critical Assessment of Using Ionic Liquid as Entrainer via Extractive Distillation.”

### **Detailed Information of Estimated PLXANT model**

Figure S1. Estimated PLXANT model of [EMIM][OAC] by the critical temperature from the group contribution method and Klincewicz method.

### **Detailed Information of Economic Analysis**

Table S1 Basis of economics and equipment sizing.

### **Retrofitted or Duplicate Process Flowsheet for Separation**

Table S2 UNIQUAC model parameters of acetone/methanol/DMSO system.

Table S3 NRTL model parameters of IPA/water/DMSO system

Figure S2. Retrofitted process flowsheet for acetone/methanol separation based on Luyben’s work.

Figure S3. Duplicate process flowsheet for IPA dehydration to 99.9999 mol% from Arifin and Chien’s work.

Figure S4. Retrofitted process flowsheet for IPA dehydration to 99.99 mol% from Liang et al.’s work.

### **Sensitivity Analysis to Impurity in IL Recover Stream**

Figure S5. Sensitivity analysis of how E/F, NE, NF and NT influence  $X_{mmax}$  for acetone/methanol separation.

Figure S6. Sensitivity analysis of how E/F, NE, NF and NT influence  $X_{wmax}$  for 99.9999 mol% IPA case.

Figure S7. Sensitivity analysis of how E/F, NE, NF and NT influence  $X_{wmax}$  for 99.99 mol% IPA case.

## Supporting Information I: Estimated PLXANT model

Figure S1. Estimated PLXANT model of [EMIM][OAC] by the critical temperature from the group contribution method and Klincewicz method.

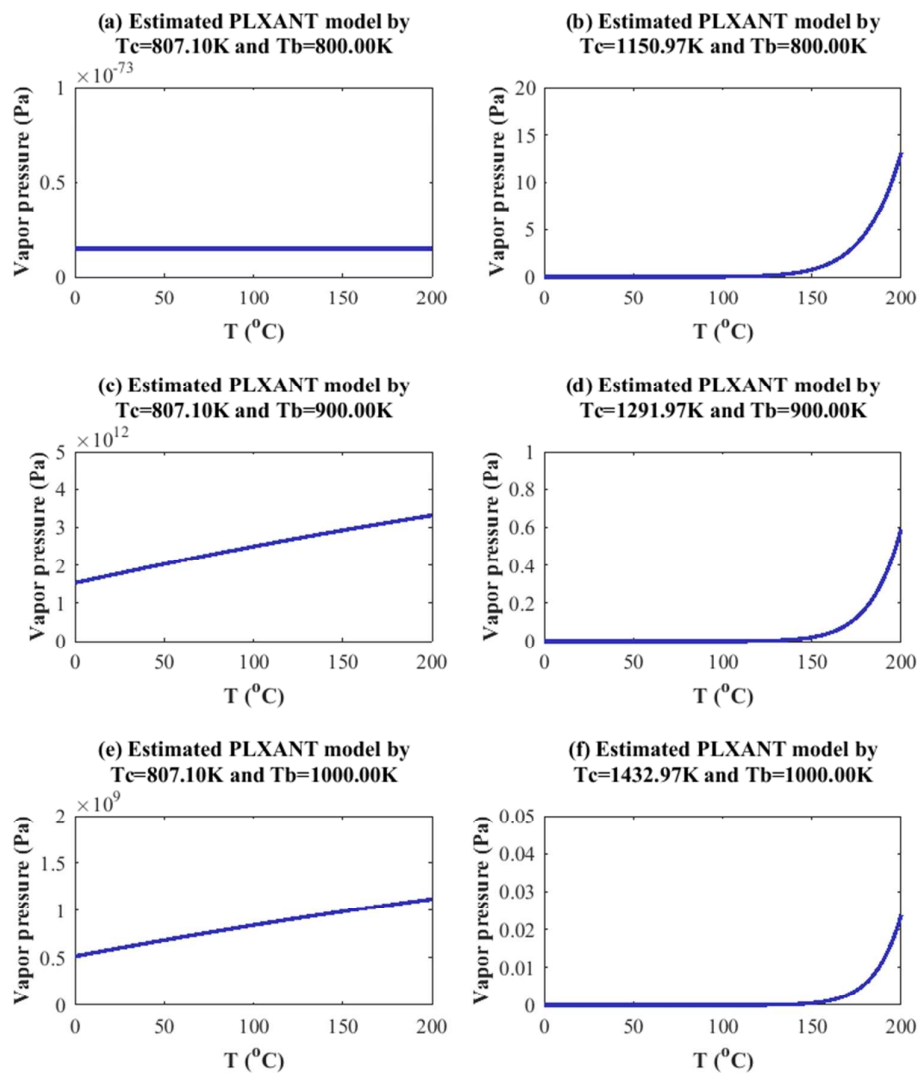

## Supporting Information II: detailed information of economic analysis

Table S1 Basis of economics and equipment sizing

Column diameter (D): Aspen tray sizing

Column length (L): NT trays with 2-ft spacing plus 20% extra length

Column and other vessel (D and L are in meters)

$$\text{Capital cost} = 17,640(D)^{1.066}(L)^{0.802}$$

Condensers (area in  $\text{m}^2$ )

$$\text{Heat-transfer coefficient} = 0.852 \text{ kW/K-m}^2$$

$$\text{Differential temperature} = \text{reflux-drum temperature} - 315 \text{ K}$$

$$\text{Capital cost} = 7296(\text{area})^{0.65}$$

Reboilers (area in  $\text{m}^2$ )

$$\text{Heat-transfer coefficient} = 0.568 \text{ kW/K-m}^2$$

$$\text{Differential temperature} = \text{steam temperature} - \text{base temperature} (\Delta T > 20 \text{ K})$$

$$\text{Capital cost} = 7296(\text{area})^{0.65}$$

Vacuum system

Steam ejector

$$\text{Size factor (S): flow rate (lb/hr)/suction pressure (torr)}$$

Cost multiplying factor ( $C_M$ ):

$$\text{One-stage: 1.0, two-stages: 1.8, three-stages: 2.1}$$

$$\text{Capital cost} = 1690(C_M)(S)^{0.41}$$

Steam used amount is assumed to be 10 times of flowrate.

$$\text{Operating cost} = (\text{Steam consumption}) * (\text{LP steam cost})$$

Liquid-ring pump

$$\text{Size factor (S): flow rate (ft}^3\text{/min)}$$

$$\text{Capital cost} = 8250(S)^{0.35}$$

Screw compressor

$$\text{Size factor (S): flow rate (ft}^3\text{/min)}$$

$$\text{Capital cost} = 9590(S)^{0.38}$$

Energy cost

$$\text{HP steam} = \$9.88/\text{GJ (41 barg, 254 }^\circ\text{C)}$$

$$\text{MP steam} = \$8.22/\text{GJ (10 barg, 184 }^\circ\text{C)}$$

$$\text{LP steam} = \$7.78/\text{GJ (5 barg, 160 }^\circ\text{C)}$$

$$\text{Cooling water (320K)} = \$0.354/\text{GJ}$$

$$\text{Chilled water (15 }^\circ\text{C)} = \$4.43/\text{GJ}$$

$$\text{Refrigerant at -50 }^\circ\text{C} = \$13.11/\text{GJ}$$

$$\text{Refrigerant at -67.78 }^\circ\text{C} = \$17.97/\text{GJ}$$

Refrigerant at  $-101.11\text{ }^{\circ}\text{C}$  = \$26.71/GJ

Electricity = \$16.9/GJ

Chemical cost

Acetone = \$3.40/kg

IPA = \$3.87/kg

TAC = (capital cost/payback period) + energy cost;

Payback period = 3 years; Operating hour = 8000 hours/year

### Supporting Information III: Retrofitted or Duplicate Process Flowsheet for Separation

Table S2 UNIQUAC model parameters of acetone/methanol/DMSO system.

| Component i<br>Component j<br>Source | Acetone<br>Methanol<br>ASPEN VLE-IG | Acetone<br>DMSO<br>ASPEN VLE-IG | Methanol<br>DMSO<br>ASPEN VLE-IG |
|--------------------------------------|-------------------------------------|---------------------------------|----------------------------------|
| $a_{ij}$                             | 0                                   | 0                               | 0                                |
| $a_{ji}$                             | 0                                   | 0                               | 0                                |
| $b_{ij}$ (K)                         | -225.1533                           | -62.9317                        | 129.3624                         |
| $b_{ji}$ (K)                         | 52.7705                             | -20.3857                        | 23.4854                          |

UNIQUAC activity coefficient model:

$$\ln \gamma_i = \frac{\Phi_i}{x_i} + \frac{z}{2} q_i \ln \left( \frac{\theta_i}{\Phi_i} \right) - q_i' \ln \left( \sum_k \theta_k \tau_{ki} \right) - q_i \sum_j \frac{\theta_j \tau_{ij}}{\sum_j \theta_j \tau_{ji}} + l_i + q_i - \frac{\Phi_i}{x_i} \sum_j x_j l_j,$$

where

$\gamma_i$  is the activity coefficient of component i,

$x_i$  is the mole fraction of component i,

$q_i$  is the pure component area parameter of component i,

$r_i$  is the pure component volume parameter of component i,

$$\Phi_i = \frac{x_i r_i}{\sum_k x_k r_k},$$

$$\theta_i = \frac{x_i q_i}{\sum_k x_k q_k},$$

$$\tau_{ij} = \exp \left( a_{ij} + \frac{b_{ij}}{T} \right),$$

$$l_i = \frac{z}{2} (r_i - q_i) + 1 - r_i,$$

$$z = 2.$$

Table S3 NRTL model parameters of IPA/water/DMSO system.

| Component i<br>Component j<br>Source | Isopropanol<br>Water<br>ASPEN VLE-IG | Isopropanol<br>DMSO<br>ASPEN VLE-IG | Water<br>DMSO<br>ASPEN VLE-IG |
|--------------------------------------|--------------------------------------|-------------------------------------|-------------------------------|
| $a_{ij}$                             | -1.3115                              | 0                                   | -1.2449                       |
| $a_{ji}$                             | 6.8284                               | 0                                   | 1.7524                        |
| $b_{ij}$ (K)                         | 426.40                               | 115.28                              | 586.80                        |
| $b_{ji}$ (K)                         | -1483.46                             | -25.01                              | -1130.22                      |
| $c_{ij}$                             | 0.30                                 | 0.30                                | 0.30                          |

NRTL model:

$$\ln \gamma_i = \frac{\sum_j x_j \tau_{ji} G_{ji}}{\sum_k x_k G_{ki}} + \sum_j \left[ \frac{x_j G_{ij}}{\sum_k x_k G_{kj}} \left( \tau_{ij} - \frac{\sum_m x_m \tau_{mj} G_{mj}}{\sum_k x_k G_{kj}} \right) \right],$$

$$G_{ij} = \exp(-c_{ij} \tau_{ij}),$$

$$\tau_{ij} = a_{ij} + \frac{b_{ij}}{T}, \quad \tau_{ii} = 0$$



Figure S2. Retrofitted process flowsheet for acetone/methanol separation based on Luyben's work.

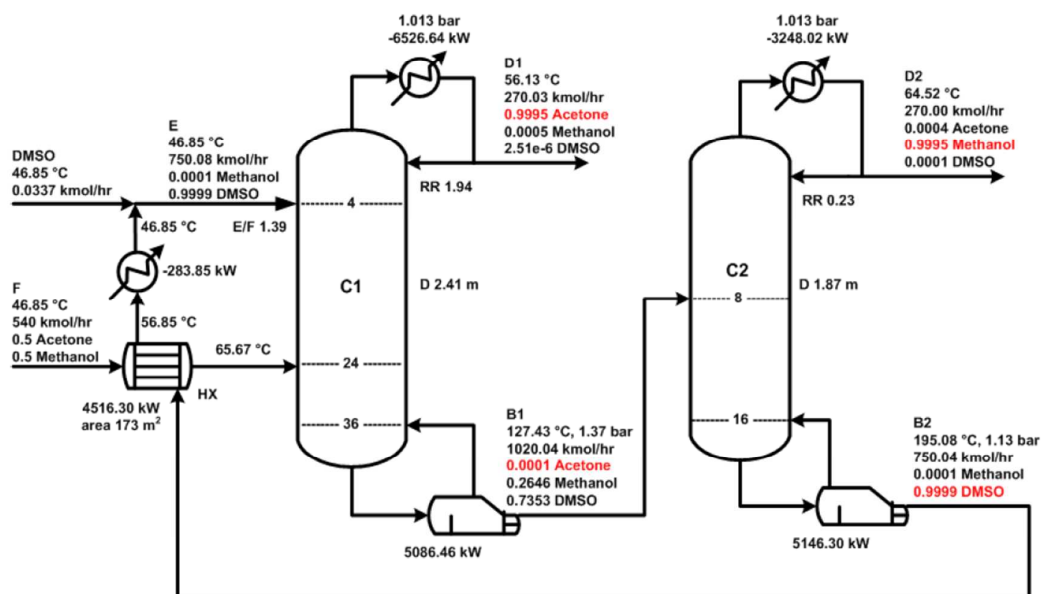

Figure S3. Duplicate process flowsheet for IPA dehydration to 99.9999 mol% from Arifin and Chien's work.

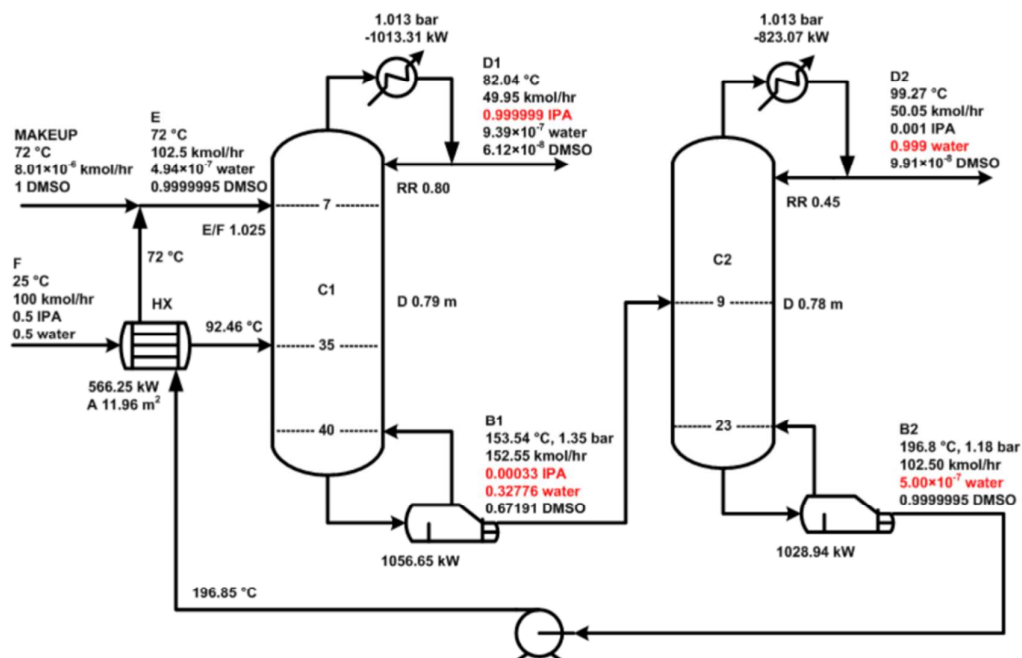

Figure S4. Retrofitted process flowsheet for IPA dehydration to 99.9999 mol% from Liang et al.'s work.

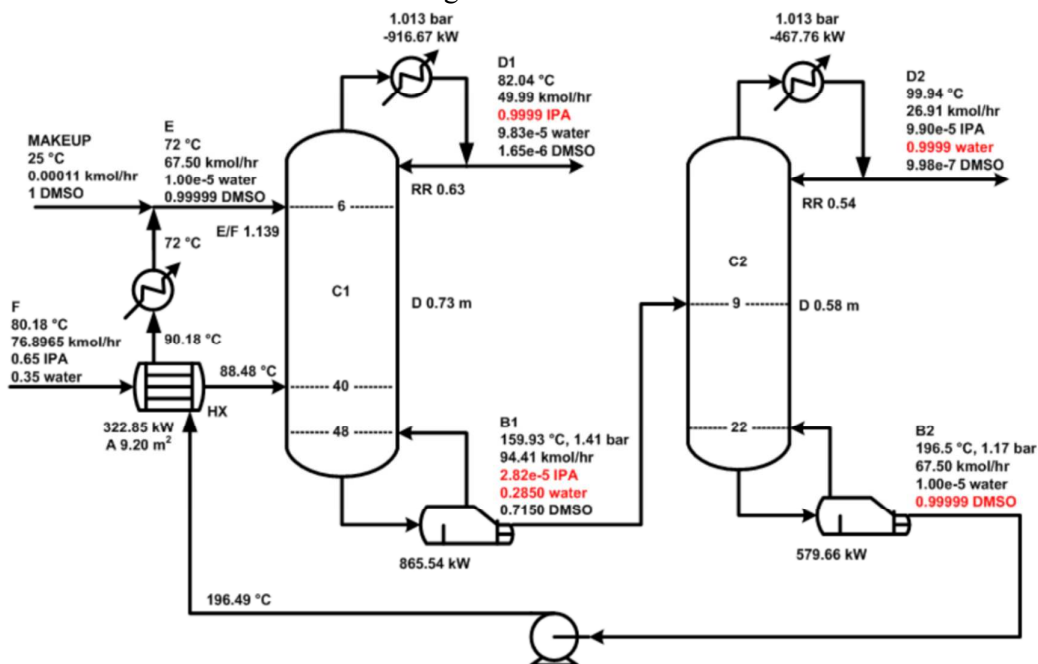

## Supporting Information IV: Sensitivity Analysis to Impurity in IL Recover

### Stream

Figure S5. Sensitivity analysis of how E/F, NE, NF and NT influence  $X_{mmax}$  for acetone/methanol separation..

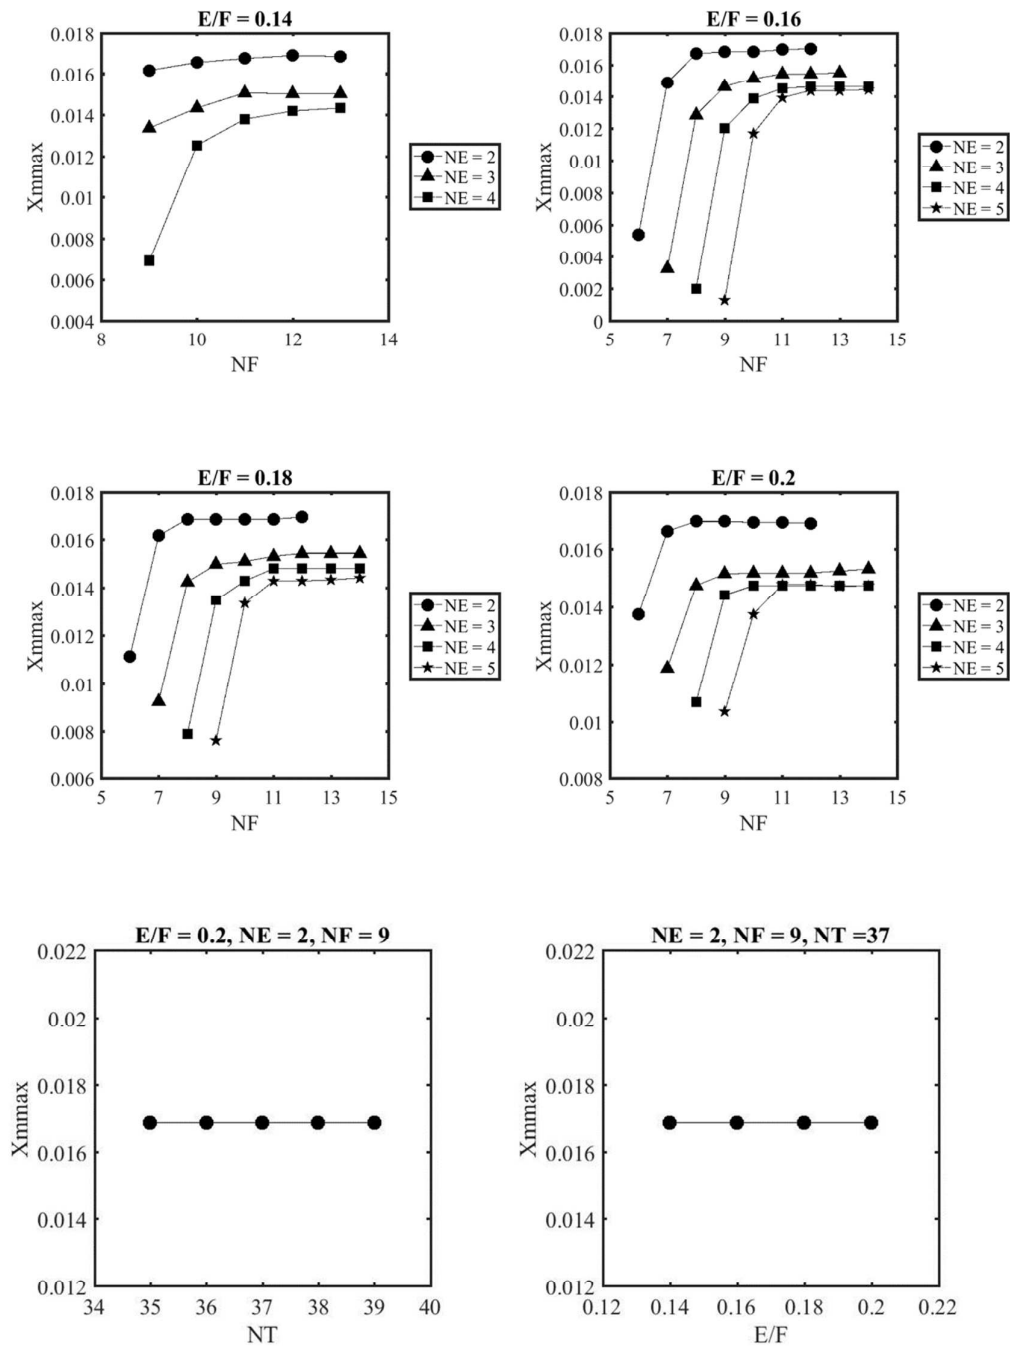

Figure S6. Sensitivity analysis of how E/F, NE, NF and NT influence Xwmax for 99.9999 mol% IPA case.

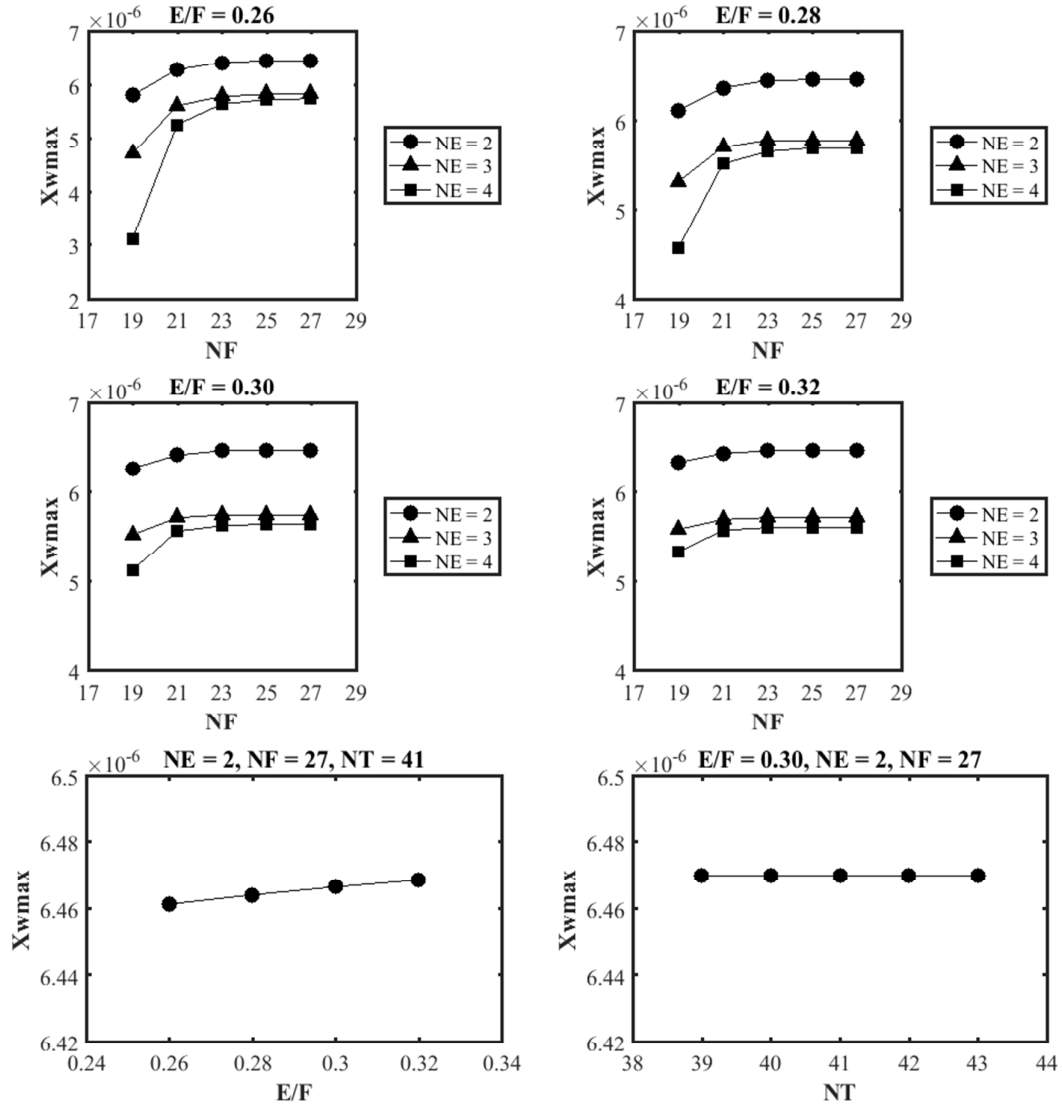

Figure S7. Sensitivity analysis of how E/F, NE, NF and NT influence Xwmax for 99.99 mol% IPA case.

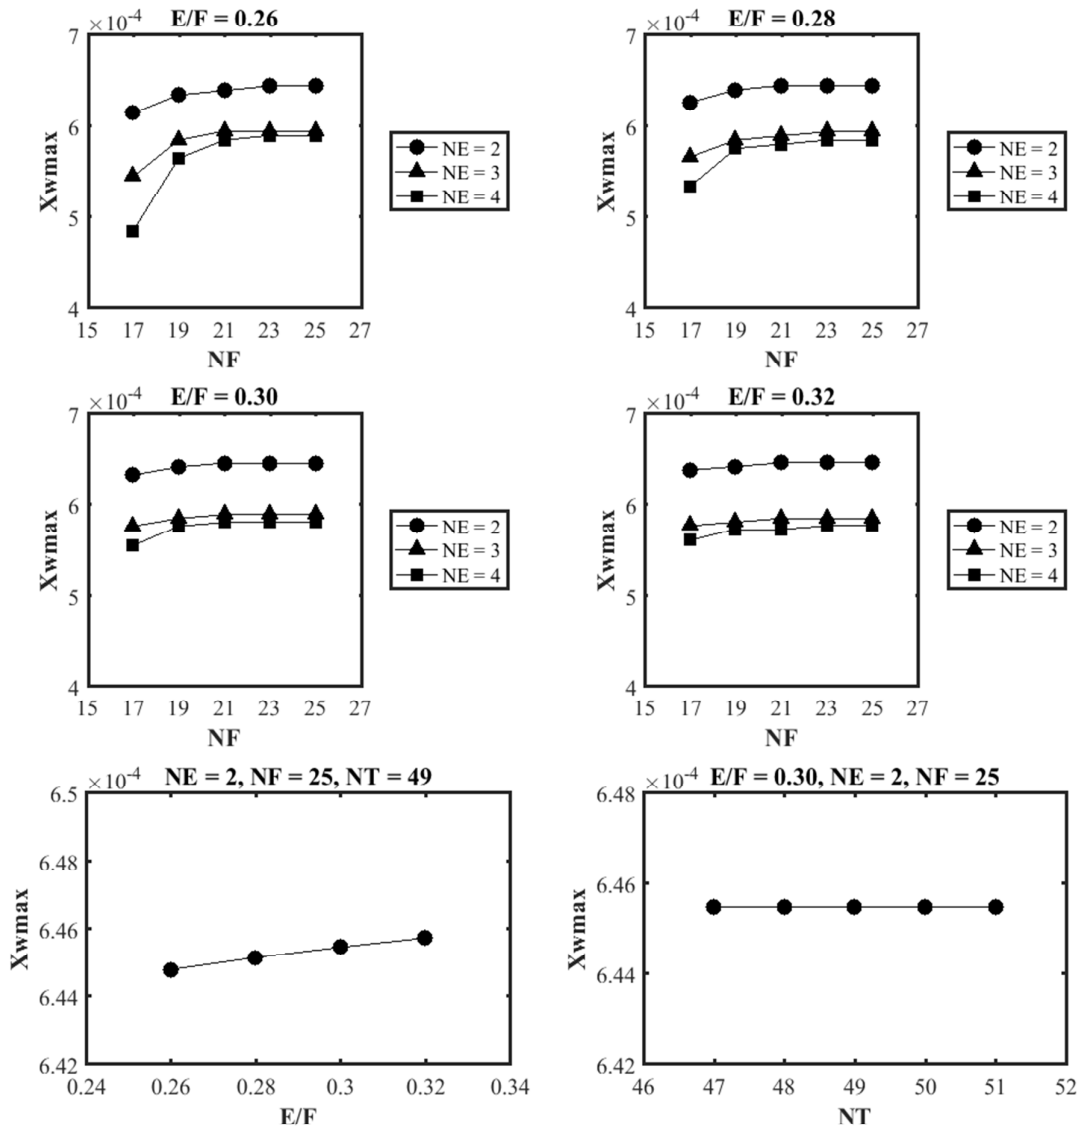

Supplement: Supplementary file 1 [file 8799622]
